# Supplementary figures and images for: Synaptic dysfunction, memory deficits and hippocampal atrophy due to ablation of mitochondrial fission in adult forebrain neurons
Source: PubMed Central journal article supplement — Cell Death Differ. 2015 Apr 24;23(1):18–28. doi: 10.1038/cdd.2015.39 (PMC4815974; doi:10.1038/cdd.2015.39), 2015-04-24

A

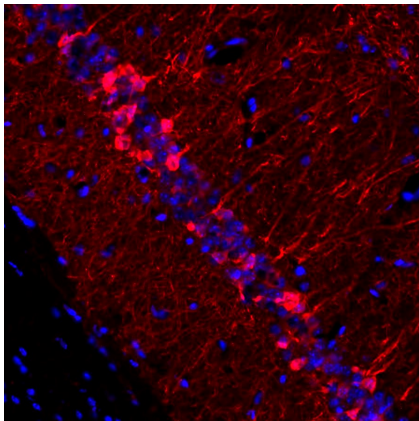

B

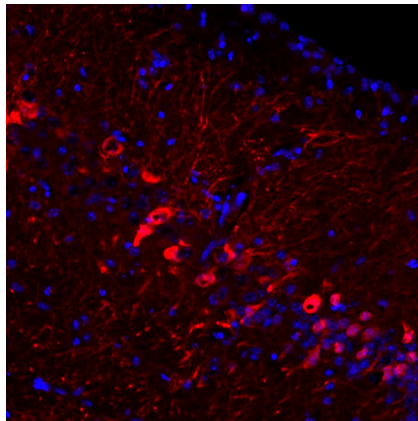

C

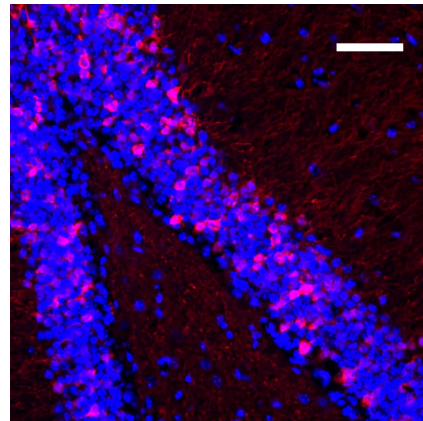

D

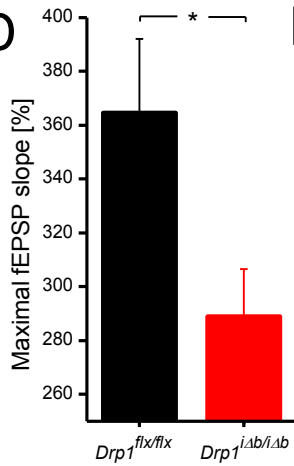

E

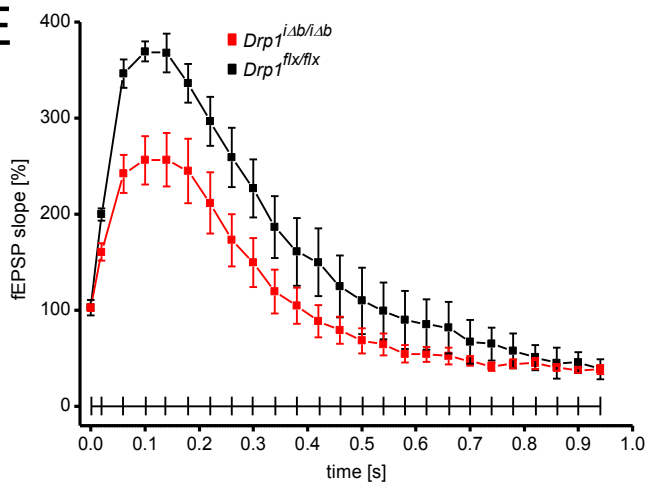

F

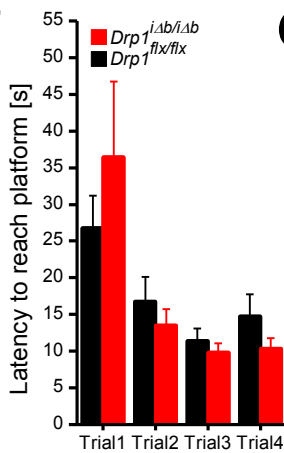

G

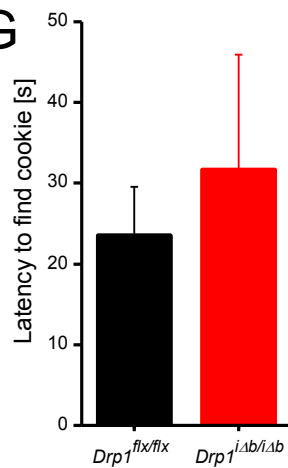

H

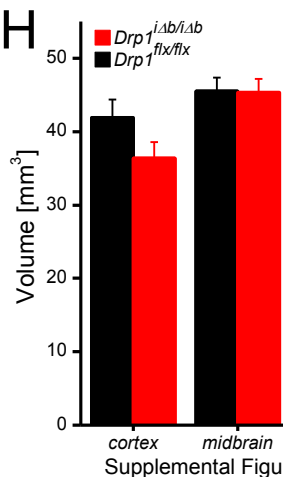

**A**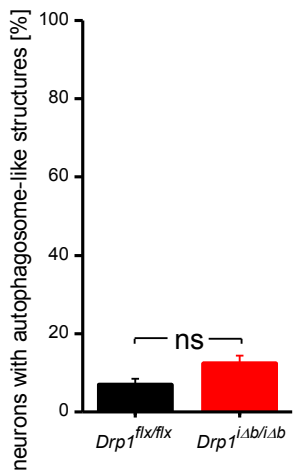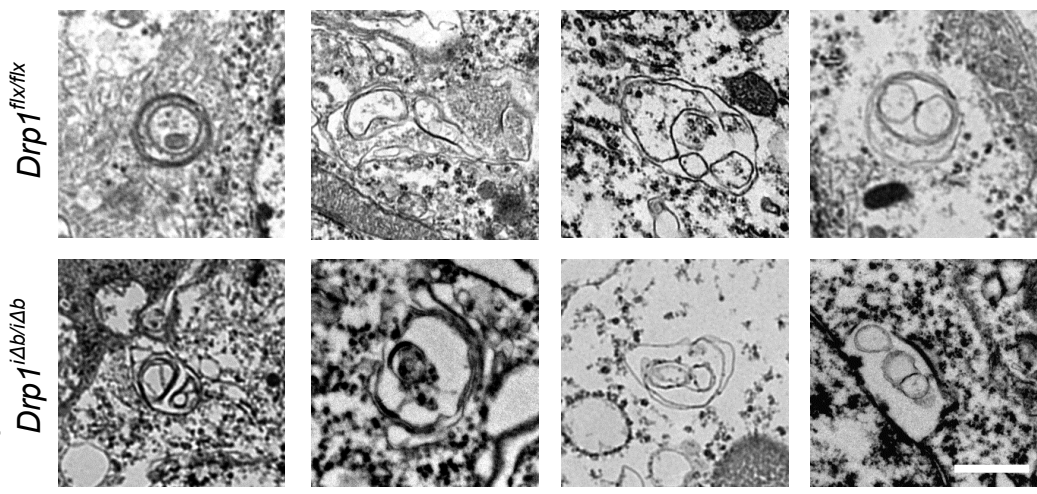

Supplement: cdd201539x2.pdf [file cdd201539x2.pdf]
